# Supplementary material for: Molecular self-assembly of 1D infinite polyiodide helices in a phenanthrolinium salt
Source: Royal Society of Chemistry journal article supplement (doi:10.1039/d0dt04042h), 2021-01-01
Supplement: d0dt04042h1.pdf [file d0dt04042h1.pdf]

## Supplementary Information

### Molecular self-assembly of 1D infinite polyiodide helices in a phenanthroline salt

*Tomasz Poręba\**, *Marcin Świątkowski* and *Rafał Kruszyński*

#### 1. Crystallographic data for **phenpi**

Electronic Supplementary Information (ESI) available: CCDC 2041514 contains the supplementary crystallographic data for this paper. These data can be obtained free of charge from The Cambridge Crystallographic Data Centre via [www.ccdc.cam.ac.uk/structures](http://www.ccdc.cam.ac.uk/structures).

Table .1. Selected crystallographic data for **phenpi**

|                                                              |                                                                              |
|--------------------------------------------------------------|------------------------------------------------------------------------------|
| Empirical formula                                            | C <sub>72</sub> H <sub>51</sub> I <sub>7</sub> N <sub>12</sub>               |
| Formula weight                                               | 1972.55                                                                      |
| Temperature/K                                                | 100.00(10)                                                                   |
| Crystal system                                               | orthorhombic                                                                 |
| Space group                                                  | <i>Pna</i> 2 <sub>1</sub>                                                    |
| <i>a</i> /Å                                                  | 24.0054(3)                                                                   |
| <i>b</i> /Å                                                  | 12.4116(2)                                                                   |
| <i>c</i> /Å                                                  | 22.5277(5)                                                                   |
| $\alpha$ /°                                                  | 90                                                                           |
| $\beta$ /°                                                   | 90                                                                           |
| $\gamma$ /°                                                  | 90                                                                           |
| Volume/Å <sup>3</sup>                                        | 6712.0(2)                                                                    |
| Z                                                            | 4                                                                            |
| $\rho_{\text{calc}}$ /cm <sup>3</sup>                        | 1.952                                                                        |
| $\mu$ /mm <sup>-1</sup>                                      | 25.833                                                                       |
| F(000)                                                       | 3752.0                                                                       |
| Crystal size/mm <sup>3</sup>                                 | 0.793 × 0.128 × 0.084                                                        |
| Radiation                                                    | CuK $\alpha$ ( $\lambda$ = 1.54184)                                          |
| 2 $\theta$ range for data collection/°                       | 7.85 to 136.496                                                              |
| Index ranges                                                 | -28 ≤ <i>h</i> ≤ 28, -14 ≤ <i>k</i> ≤ 14, -18 ≤ <i>l</i> ≤ 27                |
| Reflections collected                                        | 32490                                                                        |
| Independent reflections                                      | 9745 [ <i>R</i> <sub>int</sub> = 0.0580, <i>R</i> <sub>sigma</sub> = 0.0472] |
| Data/restraints/parameters                                   | 9745/39/424                                                                  |
| Goodness-of-fit on <i>F</i> <sup>2</sup>                     | 1.172                                                                        |
| Final <i>R</i> indexes [ <i>I</i> > 2 $\sigma$ ( <i>I</i> )] | <i>R</i> <sub>1</sub> = 0.0578, <i>wR</i> <sub>2</sub> = 0.1392              |
| Final <i>R</i> indexes [all data]                            | <i>R</i> <sub>1</sub> = 0.0624, <i>wR</i> <sub>2</sub> = 0.1417              |
| Largest diff. peak/hole / e Å <sup>-3</sup>                  | 1.25/-2.40                                                                   |
| Flack parameter                                              | 0.012(8)                                                                     |

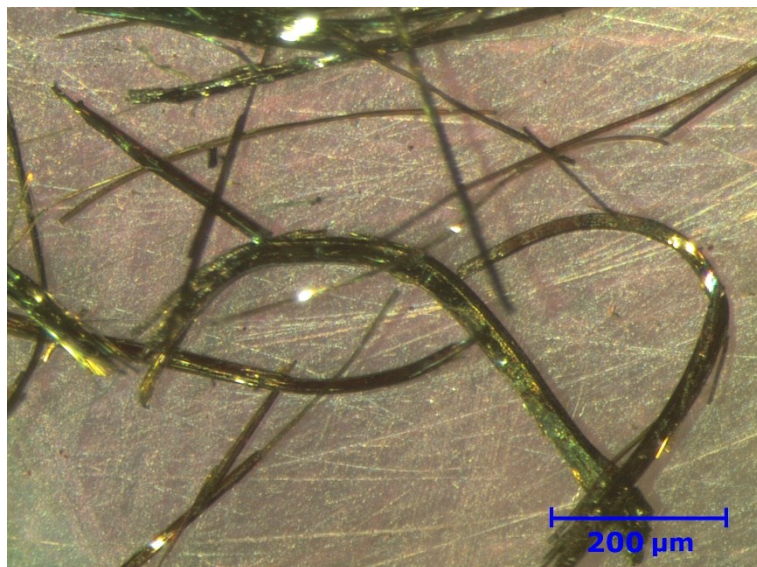

Figure 1. Microphotograph of **phenpi** crystals.

## 2. Powder diffraction data for **phenpi**

Powder diffraction data was fitted using Pawley method, as implemented in TOPAS software. Refined unit cell parameters at 298 K are:  $a = 23.8503(5) \text{ \AA}$ ,  $b = 12.5979(4) \text{ \AA}$ ,  $c = 22.2769(7) \text{ \AA}$ ,  $\alpha = \beta = \gamma = 90^\circ$  (Figure 2 SI;  $R_{wp} = 3.35\%$ ,

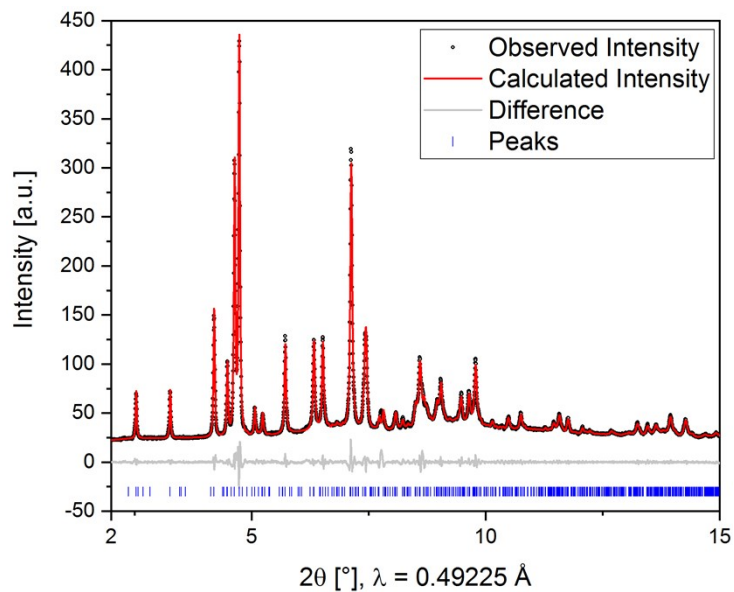

Figure 2. PXRD data for **phenpi**.

GoF = 2.46).

## 3. Mass spectra for decomposition products of **phenpi**

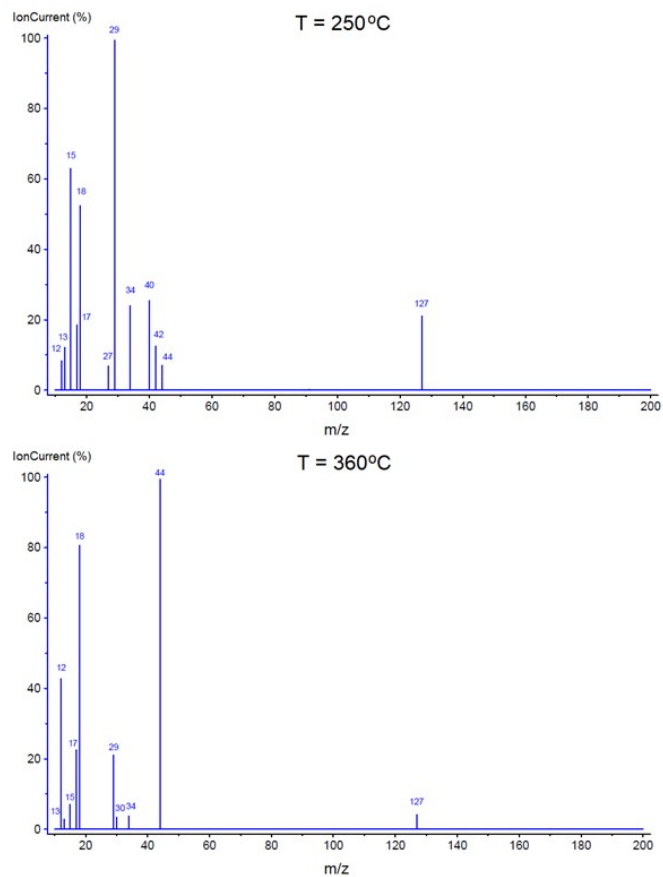

**Figure 3.** Mass spectra of volatile products from the thermal decomposition of phenpi registered at 250°C and 360°C. The elaboration of the mass spectra involved subtracting the background spectrum and application of an automatic software correction for the carrier gas.
